# Supplementary material for: Alkali-metal-ion-doping strategy to improve the photovoltaic properties of Ag2BiI5 solar cells
Source: Royal Society of Chemistry journal article supplement (doi:10.1039/d1nj02627e), 2021-01-01
Supplement: d1nj02627e1.pdf [file d1nj02627e1.pdf]

**Electronic supplementary information**

**Alkali doping strategy to improve the photovoltaic properties of  
 $\text{Ag}_2\text{BiI}_5$  solar cells**

Yuxiang Wang,<sup>a, b</sup> Yue Liu,<sup>a, b</sup> Xinan Shi,<sup>a</sup> Lijian Huang,<sup>a</sup> Junye Tong,<sup>a</sup> Gang Wang,<sup>a, b\*</sup>  
and Daocheng Pan<sup>a, b\*</sup>

*<sup>a</sup>State Key Laboratory of Rare Earth Resource Utilization, Changchun Institute of Applied Chemistry, Chinese Academy of Sciences, 5625 Renmin Street, Changchun, Jilin 130022, China;*

*<sup>b</sup>University of Science and Technology of China, Hefei, Anhui 230026, China;*

Tel & fax: +86-431-85262544; E-mail: wsu@ciac.ac.cn and pan@ciac.ac.cn

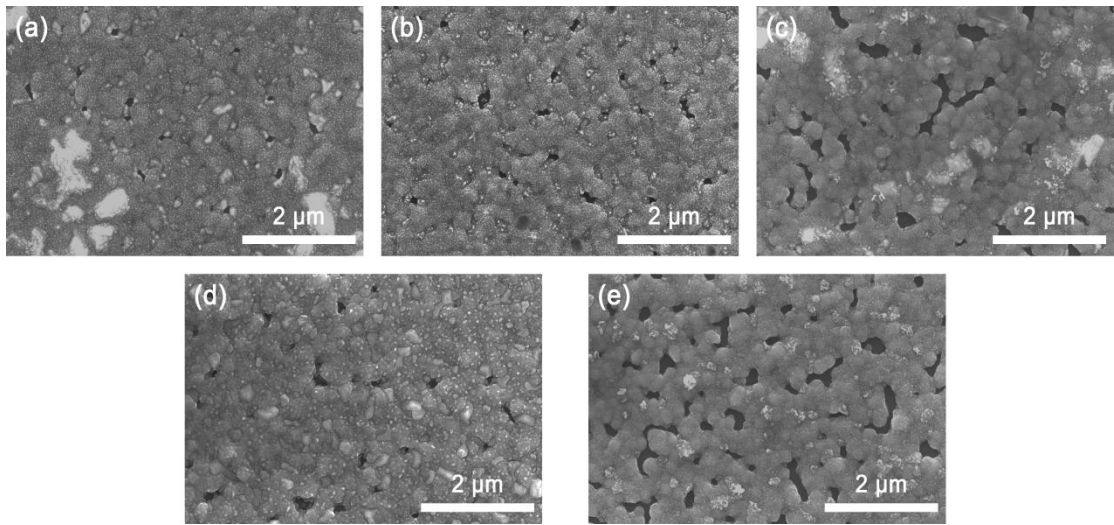

**Fig. S1.** Top-view SEM images of as-prepared Ag-Bi-S-I films doped with (a)  $\text{Li}^+$ ; (b)  $\text{Na}^+$ ; (c)  $\text{K}^+$ ; (d)  $\text{Rb}^+$  and (e)  $\text{Cs}^+$ .

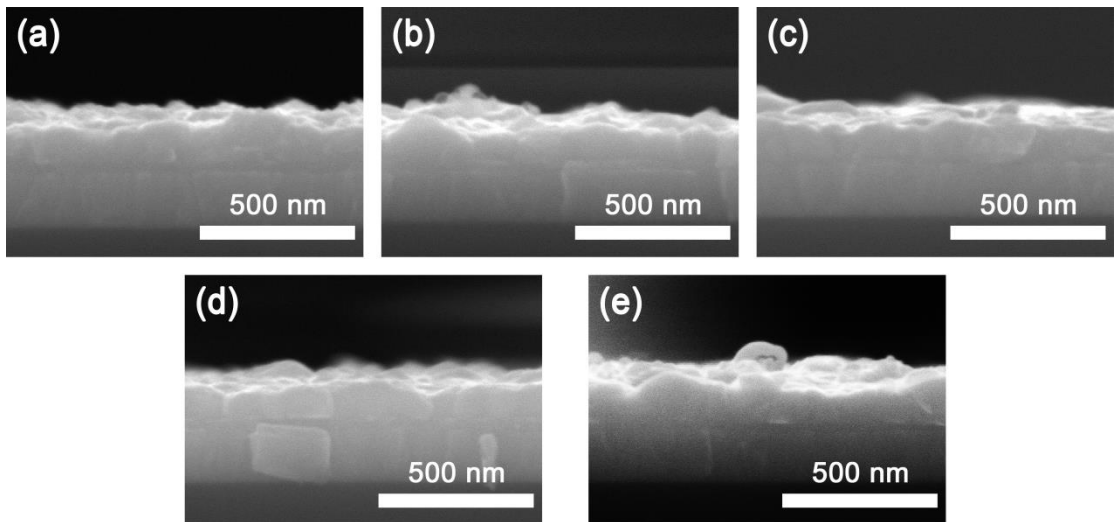

**Fig. S2.** Cross-sectional SEM images of as-prepared Ag-Bi-S-I films doped with (a)  $\text{Li}^+$ ; (b)  $\text{Na}^+$ ; (c)  $\text{K}^+$ ; (d)  $\text{Rb}^+$  and (e)  $\text{Cs}^+$ .

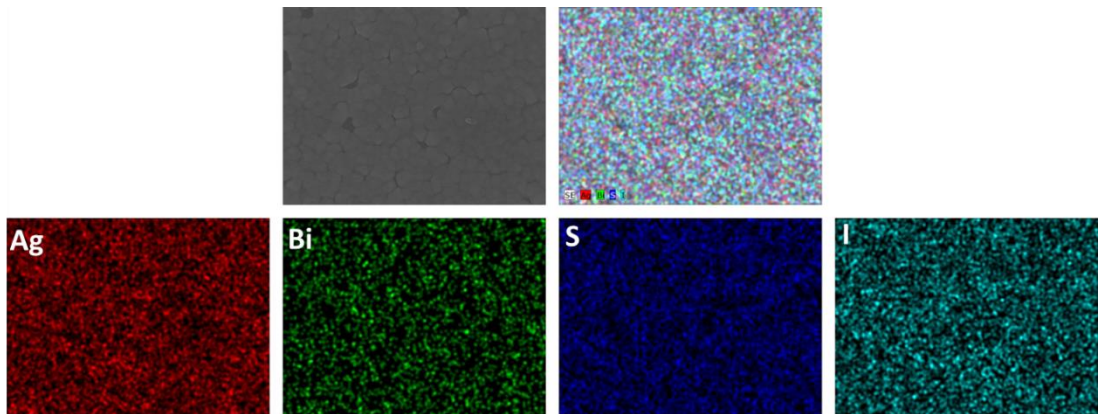

**Fig. S3.** The energy dispersive spectroscopy (EDS) mapping of as-prepared undoped  $\text{Ag}_2\text{BiI}_5$  film.

**Table S1.** The elements contents of the as-prepared  $\text{Ag}_2\text{BiI}_5$  thin films doped with different alkali ions.

| Sample                              | Ag<br>(at.%) | Bi<br>(at.%) | I<br>(at.%) | alkali<br>(at.%) | alkali/(Ag+Bi)<br>(%) |
|-------------------------------------|--------------|--------------|-------------|------------------|-----------------------|
| $\text{Ag}_2\text{BiI}_5$           | 28.38        | 12.06        | 59.56       | -                | -                     |
| $\text{Ag}_2\text{BiI}_5:\text{Li}$ | 24.75        | 12.55        | 61.61       | 1.09             | 2.92                  |
| $\text{Ag}_2\text{BiI}_5:\text{Na}$ | 25.06        | 12.59        | 61.24       | 1.11             | 2.95                  |
| $\text{Ag}_2\text{BiI}_5:\text{K}$  | 25.29        | 12.72        | 61.86       | 1.13             | 2.97                  |
| $\text{Ag}_2\text{BiI}_5:\text{Rb}$ | 25.55        | 12.86        | 60.45       | 1.14             | 2.97                  |
| $\text{Ag}_2\text{BiI}_5:\text{Cs}$ | 25.70        | 13.07        | 60.05       | 1.18             | 3.04                  |

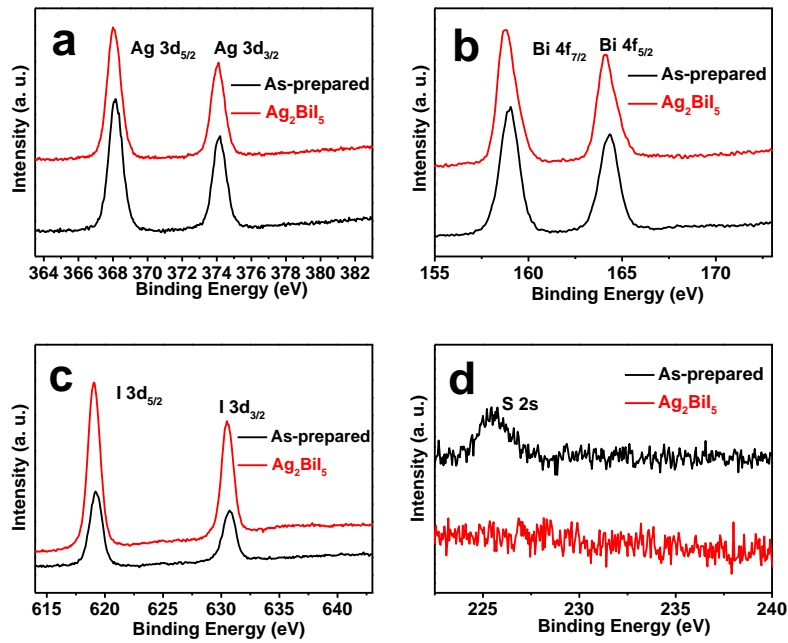

**Fig. S4.** XPS spectra (a) Ag 3d, (b) Bi 4f, (c) I 3d, (d) S 2s of Ag<sub>2</sub>BiI<sub>5</sub> and as-prepared Ag-Bi-S-I thin films.

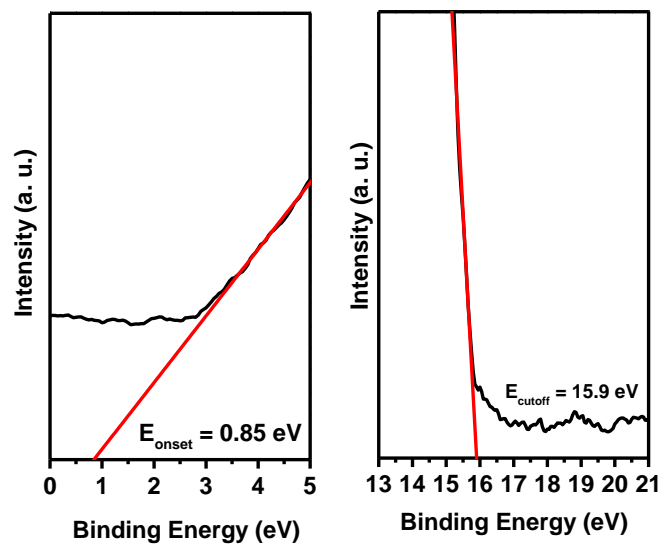

**Fig. S5.** UPS spectra of Ag<sub>2</sub>BiI<sub>5</sub> thin film.

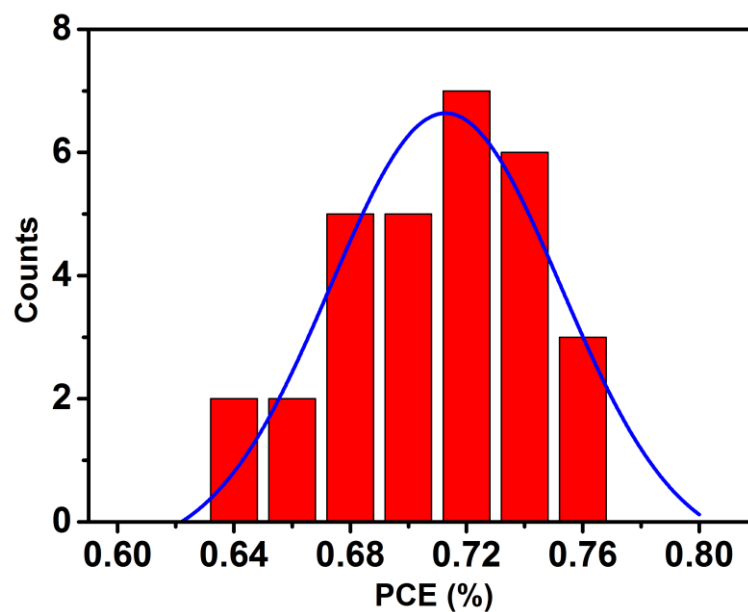

**Fig. S6.** Statistical efficiency distribution of 30 devices with the  $K^+$ -doped  $Ag_2BiI_5$  absorber layers.

**Table S2.** PV parameters of the  $Ag_2BiI_5$  solar cells with and without alkali doping (PTAA for HTL).

| Sample | $J_{sc}$<br>( $mA/cm^2$ ) | $V_{oc}$<br>(V) | $FF$<br>(%) | PCE<br>(%) |
|--------|---------------------------|-----------------|-------------|------------|
| w/o    | 1.21                      | 0.68            | 45.97       | 0.38       |
| $Li^+$ | 1.31                      | 0.70            | 53.61       | 0.49       |
| $Na^+$ | 1.55                      | 0.69            | 54.89       | 0.59       |
| $K^+$  | 1.95                      | 0.68            | 56.20       | 0.75       |
| $Rb^+$ | 1.64                      | 0.69            | 54.43       | 0.62       |
| $Cs^+$ | 1.42                      | 0.42            | 43.17       | 0.26       |

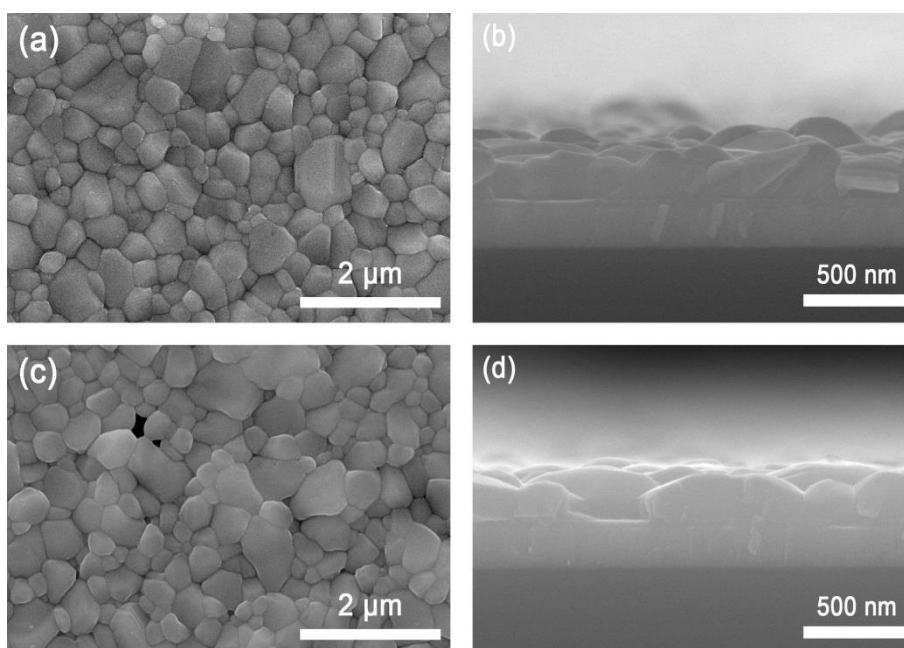

**Fig. S7.** Top-view and cross-sectional SEM images of 1% (a and b) and 2% (c and d) Cs<sup>+</sup>-doped Ag<sub>2</sub>BiI<sub>5</sub> thin films.

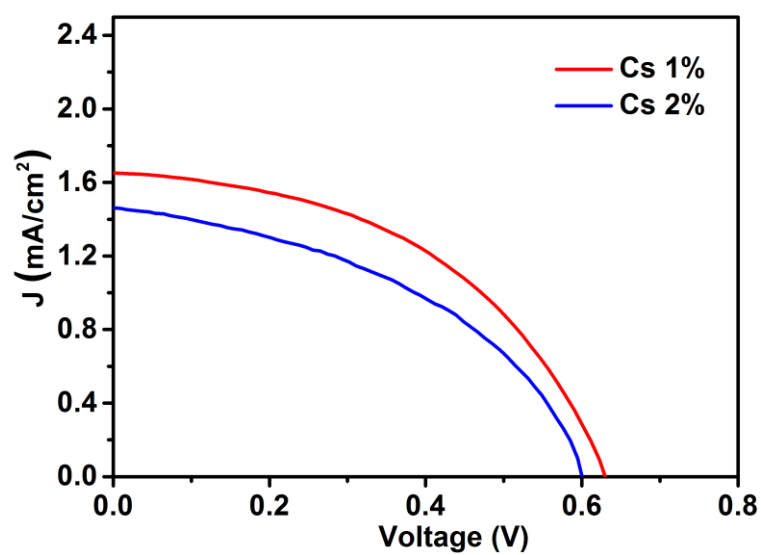

**Fig. S8.** *J-V* curves of 1% and 2% Cs<sup>+</sup>-doped Ag<sub>2</sub>BiI<sub>5</sub> solar cells.

**Table S3.** PV parameters of the 1% and 2% Cs<sup>+</sup>-doped Ag<sub>2</sub>BiI<sub>5</sub> solar cells (PTAA for HTL).

| Sample | $J_{sc}$<br>(mA/cm <sup>2</sup> ) | $V_{oc}$<br>(V) | $FF$<br>(%) | PCE<br>(%) |
|--------|-----------------------------------|-----------------|-------------|------------|
| 1%     | 1.65                              | 0.63            | 46.96       | 0.49       |
| 2%     | 1.46                              | 0.60            | 44.03       | 0.39       |
